# Supplementary material for: Long-Term Effectiveness of Hepatitis B Vaccination in the Protection of Healthcare Students in Highly Developed Countries: A Systematic Review and Meta-Analysis
Source: MDPI journal article supplement (doi:10.3390/vaccines10111841), 2022-10-30
Supplement: s1 [file s1]

Supplementary File S2. Critical appraisal of prevalence studies included in the present systematic review and meta-analysis.

[illegible]

|                             |     |         |     |     |     |     |     |     |     |
|-----------------------------|-----|---------|-----|-----|-----|-----|-----|-----|-----|
| Dini et al., 2017           | Yes | Yes     | Yes | Yes | Yes | Yes | Yes | Yes | No  |
| Grazzini et al, 2019        | Yes | Yes     | Yes | Yes | Yes | Yes | Yes | Yes | Yes |
| Hess et al., 2020           | Yes | Yes     | No  | Yes | Yes | Yes | Yes | Yes | Yes |
| Lee et al., 2013            | Yes | No      | No  | Yes | Yes | Yes | Yes | Yes | Yes |
| Lamberti et al., 2015       | Yes | Unclear | Yes |
| Lamberti et al., 2017       | Yes | Unclear | Yes |
| Mahallawi, 2018             | Yes | Yes     | Yes | Yes | Yes | Yes | Yes | Yes | Yes |
| Mastrodomenico et al., 2021 | Yes | Yes     | Yes | Yes | Yes | Yes | Yes | Yes | Yes |
| Nagashima et al., 2018      | Yes | Unclear | Yes |
| Ogawa et al., 2019          | Yes | Unclear | Yes |
| Ohyatsu et al., 2018        | Yes | No      | No  | Yes | Yes | Yes | Yes | Yes | Yes |
| Othman et al., 2018         | Yes | No      | Yes | No  | Yes | Yes | Yes | Yes | Yes |
| Papadopoli et al., 2020     | Yes | Yes     | Yes | Yes | Yes | Yes | Yes | Yes | Yes |
| Pavlopoulou et al., 2009    | Yes | Unclear | No  | Yes | Yes | Yes | Yes | Yes | Yes |
| Pileggi et al., 2017        | No  | Yes     | Yes | Yes | Yes | Yes | Yes | Yes | Yes |
| Riva et al., 2012           | No  | Unclear | Yes | Yes | Yes | Yes | Yes | Yes | No  |

[illegible]
